1 **Dot6 is a major regulator of cell size and a transcriptional activator of ribosome biogenesis**  
2 **in the opportunistic yeast *Candida albicans***

3  
4  
5 Julien Chaillot<sup>\*</sup>, Jaideep Malick<sup>†,1</sup> and Adnane Sellam<sup>\*,‡,2</sup>  
6  
7  
8

9 <sup>\*</sup> CHU de Québec Research Center (CHUQ), Université Laval, Quebec City, QC, Canada

10  
11 <sup>†</sup> Department of Biology, Concordia University, Montréal, Quebec, Canada

12  
13 <sup>‡</sup> Department of Microbiology, Infectious Disease and Immunology, Faculty of Medicine,  
14 Université Laval, Quebec City, QC, Canada

15

16

17 **Running title:** Cell size control by Dot6

18

19 **Keywords:** Cell size, Ribosome biogenesis, Cell growth, Cell division, Transcriptional rewiring

20

21

22

23

24

25

26

27

28 <sup>1</sup> Present address: Department of Molecular Genetics, University of Toronto, Toronto, Ontario,  
29 Canada.

30 <sup>2</sup> Corresponding author: Université Laval, CHU de Québec Research Center (CHUL), RC-0709,  
31 2705 Laurier Blvd, Quebec, QC, Canada G1V 4G2. Tel: (1) 418 525 4444 ext. 46259. E-mails:  
32 adnane.sellam.1@ulaval.ca.

### 33 **Abstract**

34 In most species, size homeostasis appears to be exerted in late G1 phase as cells commit to  
35 division, called Start in yeast and the Restriction Point in metazoans. This size threshold couples  
36 cell growth to division and thereby establishes long-term size homeostasis. Our former  
37 investigations have shown that hundreds of genes markedly altered cell size under homeostatic  
38 growth conditions in the opportunistic yeast *Candida albicans*, but surprisingly only few of these  
39 overlapped with size control genes in the budding yeast *Saccharomyces cerevisiae*. Here, we  
40 investigated one of the divergent potent size regulators in *C. albicans*, the Myb-like HTH  
41 transcription factor Dot6. Our data demonstrated that Dot6 is a negative regulator of Start and  
42 also acts as a transcriptional activator of ribosome biogenesis (*Ribi*) genes. Genetic epistasis  
43 uncovered that Dot6 interacted with the master transcriptional regulator of the G1 machinery,  
44 SBF complex, but not with the *Ribi* and cell size regulators Sch9, Sfp1 and p38/Hog1. Dot6 was  
45 required for carbon-source modulation of cell size and it is regulated at the level of nuclear  
46 localization by TOR pathway. Our findings support a model where Dot6 acts as a hub that  
47 integrate directly growth cues via the TOR pathway to control the commitment to mitotic  
48 division at G1.

49  
50  
51  
52  
53  
54  
55  
56  
57  
58  
59  
60  
61  
62  
63  
64  
65  
66  
67  
68  
69  
70  
71  
72

73

## 74 **Introduction**

75

76 In a eukaryotic organism, cell size homeostasis is maintained through a balanced coordination  
77 between cell growth and division. In the last half century, a major focus of cell biology has been  
78 the study of cell division, but how eukaryotic cells couple growth to division to maintain a  
79 homeostatic size remains poorly understood. In most eukaryotic organisms, reaching a critical  
80 cell size appears to be crucial for commitment to cell division in late G1 phase, called Start in  
81 yeast and the Restriction Point in metazoans (TURNER *et al.* 2012). Start is dynamically regulated  
82 by nutrient status, pheromone and stress, and facilitates adaptation to changing environmental  
83 conditions in microorganisms to maximize their fitness (LENSKI AND TRAVISANO 1994; KAFRI *et*  
84 *al.* 2016).

85

86 Different genome-wide genetic analyses have been accomplished in different model organisms  
87 to uncover the genetic determinism of Start and cell size control in eukaryotes. Screens of  
88 *Saccharomyces cerevisiae* mutants has identified many ribosome biogenesis (*Ribi*) genes as  
89 small size mutants (*whi*) (JORGENSEN *et al.* 2002; DUNGRRAWALA *et al.* 2012; SOIFER AND  
90 BARKAI 2014), and revealed two master regulators of *Ribi* gene expression, the transcription  
91 factor Sfp1 and the AGC family kinase Sch9, as the smallest mutants (JORGENSEN *et al.* 2004).  
92 These observations lead to the hypothesis that the rate of ribosome biogenesis is a critical  
93 element of the metric that dictates cell size (JORGENSEN *et al.* 2004; SCHMOLLER AND SKOTHEIM  
94 2015). Sfp1 and Sch9 are critical effectors of the TOR pathway and form part of a dynamic,  
95 nutrient-responsive network that controls the expression of *Ribi* genes and ribosomal protein  
96 genes (JORGENSEN *et al.* 2004; MARION *et al.* 2004; URBAN *et al.* 2007; LEMPIAINEN *et al.* 2009).  
97 Sch9 is phosphorylated and activated by TOR, and in turn inactivates a cohort of transcriptional  
98 repressors of RP genes called Dot6, Tod6 and Stb3 (HUBER *et al.* 2011).

99

100 *Candida albicans* is a diploid ascomycete yeast that is an important commensal and  
101 opportunistic pathogen in humans. While *C. albicans* and *S. cerevisiae* colonize different niches,  
102 common biological features are shared between the two yeasts including the morphological trait  
103 of budding, and core cell cycle and growth regulatory mechanisms (BERMAN 2006; COTE *et al.*  
104 2009). *C. albicans* has served as an important evolutionary milestone with which to assess  
105 evolutionary conservation of biological mechanism, and recent evidence suggests a surprising  
106 extent of rewiring of central signalling, transcriptional and metabolic networks as compared to *S.*  
107 *cerevisiae* (LAVOIE *et al.* 2009; BLANKENSHIP *et al.* 2010; LI AND JOHNSON 2010; SANDAI *et al.*  
108 2012). To assess the conservation of the size control network, we performed recently a  
109 quantitative genome-wide analysis of a systematic collection of gene deletion strains in *C.*  
110 *albicans* (SELLAM *et al.* 2016; CHAILLOT *et al.* 2017). Our screens uncovered that cell size in *C.*  
111 *albicans* is a complex trait that depends on diverse biological processes such as ribosome  
112 biogenesis, mitochondrial functions, cell cycle control and metabolism. In addition to conserved  
113 mechanisms and regulators previously identified in *S. cerevisiae* and metazoans, we uncovered  
114 many novel regulatory circuits that govern critical cell size at Start specifically in *C. albicans*. In  
115 particular, we delineate a novel stress-independent function of the p38/HOG MAPK pathway as  
116 a critical regulator of both growth, division, and poised to exert these functions in a nutrient-  
117 sensitive manner (SELLAM *et al.* 2016). Interestingly, some of the size genes identified were

118 required for fungal virulence, suggesting that cell size homeostasis may be elemental to *C.*  
119 *albicans* fitness inside the host.

120  
121 An unexpectedly potent negative Start regulator that emerges from our systematic screen was  
122 *Dot6*, which encodes a Myb-like HTH transcription factor that binds to the PAC (Polymerase A  
123 and C) motif CGATG (ZHU *et al.* 2009; SELLAM *et al.* 2016; CHAILLOT *et al.* 2017). *dot6* was  
124 among the smallest mutant identified by our screen. *C. albicans* *Dot6* is the ortholog of two  
125 redundant transcriptional repressors of rRNA and *Ribi* gene expression called *Dot6* and *Tod6* in  
126 *S. cerevisiae*, which are antagonized by *Sch9*, and which cause only a minor large size phenotype  
127 when deleted together (HUBER *et al.* 2011). Here, we show that the *C. albicans* *Dot6* is a potent  
128 size regulator that govern critical cell size at Start and, in an opposite role than in *S. cerevisiae*,  
129 *Dot6* acts as a transcriptional activator of *RiBi* genes. We also showed that the TOR pathway  
130 relays nutrient-dependent signal for size control to the Start machinery via *Dot6*. Genetic  
131 interactions with deletions of different known Start regulators revealed epistatic interaction with  
132 the master transcriptional regulator of the G1-S transition, SBF complex (*Swi4-Swi6*), but not  
133 with *SCH9*, *SFPI* or *HOG1*. These data emphasize the evolutionary divergence between *C.*  
134 *albicans* and *S. cerevisiae* and consolidate the role of *Tor1-Dot6* network as a key cell size  
135 control mechanism in *C. albicans*.

## 136 **Materials and Methods**

### 137 **Growth conditions and *C. albicans* Strains**

138 The strains used in this study are listed in **Table S1**. *C. albicans* strains were generated and  
139 propagated using standard yeast genetics methods. For general propagation and maintenance  
140 conditions, the strains were cultured at 30°C in yeast-peptone-dextrose (YPD) medium  
141 supplemented with uridine (2% Bacto-peptone, 1% yeast extract, 2% dextrose, and 50 µg/ml  
142 uridine) or in Synthetic Complete medium (SC; 0.67% yeast nitrogen base with ammonium  
143 sulfate, 2% glucose, and 0.079% complete supplement mixture). The *DOT6-Δ*[1555-1803]  
144 truncated mutant was generated by inserting a STOP codon using CRISPR-Cas9 mutagenesis  
145 system (VYAS *et al.* 2015). gRNA was generated by annealing the *Dot6*-sgRNA-Top and *Dot6*-  
146 sgRNA-Bottom primers. Repair template was created using *Dot6*-STOP-Top and *Dot6*-STOP-  
147 Bottom primers (**Table S2**). The *C. albicans* SC5314 strain was co-transformed with the  
148 linearized plasmid pV1093 containing *Dot6*-gRNA with the repair template using lithium acetate  
149 transformation procedure and selected in Nourseothricin (Jena Bioscience). *DOT6* truncation  
150 was confirmed by sequencing.

### 151 152 **Cell size assessment**

153 Cell size distributions were obtained using the Z2-Coulter Counter (Beckman). *C. albicans* cells  
154 were grown overnight in YPD at 30°C, diluted 1000-fold into fresh YPD or SC media and grown  
155 for 4 hours at 30°C to an early log phase density of  $5 \times 10^6$  -  $10^7$  cells/ml. A fraction of 100 µl of  
156 log phase culture was diluted in 10 ml of Isoton II electrolyte solution, sonicated three times for  
157 10s and the distribution measured at least 3 times on a Z2-Coulter Counter. Size distributions  
158 were normalized to cell counts in each of 256 size bins and size reported as the peak median  
159 value for the distribution. Data analysis and clustering of size distributions were performed using  
160 custom R scripts that are available on request.

### 161 162 **Start characterization**

163 The critical cell size at Start was determined by plotting budding index as a function of size in  
164 synchronous G1 phase fractions obtained using a JE-5.0 elutriation rotor with 40 ml chamber in a  
165 J6-Mi centrifuge (Beckman, Fullerton, CA) as described previously (TYERS *et al.* 1993). *C.*  
166 *albicans* G1 phase cells were released in fresh YPD medium and fractions were harvested at an  
167 interval of 10 min to monitor bud index. For the *dot6* mutant and the WT strains, additional size  
168 fractions were collected to assess transcript levels of the *RNR1*, *PCL2* and *ACT1* using qPCR  
169 (quantitative real time PCR) as cells progressed through G1 phase at progressively larger sizes.

## 170 **Growth assays**

171 *C. albicans* cells were resuspended in fresh SC at an OD<sub>600</sub> of 0.05. A total volume of 99 µl cells  
172 was added to each well of a flat-bottom 96-well plate in addition to 1 µl of the corresponding  
173 stock solution of either rapamycin or cycloheximide (Sigma). Growth assay curves were  
174 performed in triplicate in 96-well plate format using a Sunrise™ plate-reader (Tecan) at 30°C  
175 under constant agitation with OD<sub>600</sub> readings taken every 10 min for 30h.

176

## 177 **Cellular localization of Dot6**

178 A *DOT6/dot6* heterozygous strain was GFP-tagged *in vivo* at the C-terminal region with a GFP-  
179 Arg4 PCR product as previously described (GOLA *et al.* 2003). Transformants were selected on  
180 SC minus Arginine plates, and correct integration of the GFP tag was checked by PCR and  
181 sequencing (**Table S2**). Live-cell microscopy of Dot6-GFP was performed with a Leica  
182 DMI6000B inverted confocal microscope (Leica) and a C9100-13 camera CCD camera  
183 (Hamamatsu). The effect of TOR activity on Dot6-GFP localization was assessed as following:  
184 cells grown on SC medium were exposed to rapamycin (100 ng/ml) for 60 min, washed once  
185 with PBS buffer and immediately visualized. *C. albicans* vacuoles were stained using the  
186 CellTracker Blue CMAC dye (ThermoFisher) following the manufacturer's recommended  
187 procedure.

188

## 189 **Size genetic epistasis**

190 *dot6* mutant was subjected to epistatic analysis with deletions of known Start regulators (SELLAM  
191 *et al.* 2016) (**Table S1**). Gene deletion was performed as previously described (GOLA *et al.*  
192 2003). The complete set of primers used to generate deletion cassettes and to confirm gene  
193 deletions are listed in **Table S2**. Size distribution of at least, two independent double mutants  
194 were determined. Epistasis was only noted if size distributions of a single and double mutant  
195 overlapped.

196

## 197 **Microarray transcriptional profiling**

198 Overnight cultures of *dot6* mutant and WT strains were diluted to an OD<sub>600</sub> of 0.1 in 1 L fresh  
199 YPD-uridine medium, grown at 30°C to an OD<sub>600</sub> of 0.8 and separated into size fractions by  
200 using the Beckman JE-5.0 elutriation system at 16°C. A total of 10<sup>8</sup> unbudded G1 phase cells  
201 were harvested, released into fresh YPD medium and grown for 10 min prior to harvesting by  
202 centrifugation and stored at -80°C. Total RNA was extracted using an RNAeasy purification kit  
203 (Qiagen) and glass bead lysis in a Biospec Mini 24 bead-beater. Total RNA was eluted, assessed  
204 for integrity on an Agilent 2100 Bioanalyzer prior to cDNA labeling, microarray hybridization  
205 and analysis (SELLAM *et al.* 2009). The GSEA Pre-Ranked tool  
206 (<http://www.broadinstitute.org/gsea/>) was used to determine statistical significance of  
207 correlations between the transcriptome of the *dot6* mutant with a ranked gene list or GO

208 biological process terms as described by Sellam *et al.* (SELLAM *et al.* 2014). Data were visualized  
209 using the Cytoscape (SAITO *et al.* 2012) and EnrichmentMap plugin (MERICCO *et al.* 2010).

## 210 Expression analysis by qPCR

211 For qPCR experiments, cell cultures and RNA extractions were performed as described for the  
212 microarray experiment. cDNA was synthesized from 1µg of total RNA using the SuperScript III  
213 Reverse Transcription kit (ThermoFisher). The mixture was incubated at 25°C for 10 min, 37°C  
214 for 120 min and 85°C for 5 min. 2U/µl of RNase H (NEB) was added to remove RNA and  
215 samples were incubated at 37°C for 20 min. qPCR was performed using an iQ5 96-well PCR  
216 system (BioRad) for 40 amplification cycles with QuantiTect SYBR Green PCR master mix  
217 (Qiagen). The reactions were incubated at 50°C for 2 min, 95°C for 2min and cycled 40 times at  
218 95°C, 15 s; 56°C, 30 s; 72°C, 1 min. Fold-enrichment of each tested transcripts was estimated  
219 using the comparative  $\Delta\Delta C_t$  method as described by Guillemette *et al.* (GUILLEMETTE *et al.*  
220 2004). To evaluate the gene expression level, the results were normalized using Ct values  
221 obtained from Actin (*ACT1*, C1\_13700W\_A). Primer sequences used for this analysis are  
222 summarized in Supplemental **Table S2**.

223

## 224 Data Availability

225 Strains and plasmids are available upon request. Supplemental files contain three figures (Figure  
226 S1-S3) and four tables (Table S1-S4) and are available at FigShare (DOI:  
227 <https://doi.org/10.6084/m9.figshare.7008170.v1>).

## 228 Results

### 229 Dot6 is a negative regulator of START in *C. albicans*

230 We have previously shown that the transcription factor Dot6 was required for cell size control in  
231 *C. albicans* (SELLAM *et al.* 2016). A *dot6* mutant had a median size that was 21% (41fL) smaller  
232 than its congeneric parental (52fL) or the complemented strains (51fL) (**Figure 1A**). Inactivation  
233 of *DOT6* resulted in a delayed exit from the lag phase (1.5h delay as compared to the WT)  
234 (**Figure 1B**). However, *dot6* had a doubling time comparable to the WT and the complemented  
235 strains during the log phase suggesting that the size reduction of *dot6* is not a growth rate-  
236 associated phenotype (**Figure 1B**). To ascertain that this effect was mediated at Start, we  
237 evaluated two hallmarks of Start, namely bud emergence and the onset of SBF-dependent  
238 transcription as a function of cell size in synchronous G1 phase cells obtained by elutriation. As  
239 assessed by median size of cultures for which 90% of cells had a visible bud, the *dot6* mutant  
240 passed Start after growth to 26fL, whereas a parental WT control culture became 90% budded at  
241 a much larger size of 61fL (**Figure 1C**). Importantly, in the same experiment, the onset G1/S  
242 transcription was accelerated in the *dot6* strain as judged by the peak in expression of the two  
243 representative G1-transcripts, the ribonucleotide reductase large subunit, *RNR1* and the cyclin  
244 *PCL2* (**Figure 1D-E**). These results unequivocally demonstrated that Dot6 regulates the cell size  
245 threshold at Start.

246

### 247 Dot6 interacts genetically with the SBF transcription factor complex

248 As cell size is a quantitative value, absolute changes in size between single and double mutants  
249 can be used to reveal genetic interactions between different genes to construct a cell size genetic  
250 interaction network (JORGENSEN *et al.* 2002; COSTANZO *et al.* 2004; DE BRUIN *et al.* 2004). To



251 elucidate connections between Dot6 and previously identified Start regulators in *C. albicans*  
252 (SELLAM *et al.* 2016), both *DOT6* alleles were deleted in different small size mutants including  
253 *hog1*, *sch9* and *sfp1* as well as the SBF large size mutant, *swi4*. Inactivating *DOT6* in either *sfp1*,  
254 *hog1* or *sch9* resulted in cells with smaller size as compared to their congenic strains suggesting  
255 that Dot6, Sfp1, Sch9 and the p38 kinase Hog1 act in different Start pathways (**Figure 2A-C**).  
256 Furthermore, inactivation of *DOT6* in the *swi4* mutant resulted in a large size comparable to that  
257 of *swi4* mutant indicating that Dot6 acts via SBF complex to control Start (**Figure 2D**). *SWI4*  
258 deletion is also epistatic to *DOT6* regarding the growth rate in liquid YPD medium confirming  
259 that both Dot6 and Swi4 act in a common pathway (**Figure 2E**). Given the absence of epistatic  
260 interaction between Dot6 and the known conserved *Ribi* and size regulators Sch9, Sfp1 and  
261 Hog1, our data uncovered a novel uncharacterized pathway that control the critical cell size  
262 threshold in *C. albicans* (**Figure 2F**).

263

### 264 **Dot6 is a positive regulator of ribosome biogenesis genes**

265 Dot6 and its paralog Tod6 are both Myb-like transcription factors that repress *RiBi* genes in the  
266 budding yeast (LIPPMAN AND BROACH 2009; HUBER *et al.* 2011). To investigate the role of Dot6  
267 in Start control in *C. albicans*, we performed genome-wide transcriptional profiling by  
268 microarray. G1-cells of both *dot6* mutants and the parental WT strain were collected by  
269 centrifugal elutriation and their transcriptomes were characterized. Gene Set Enrichment  
270 Analysis (GSEA) was used to correlate the *dot6* transcript profile with *C. albicans* genome  
271 annotations and gene lists from other transcriptional profiles experiments (SUBRAMANIAN *et al.*  
272 2005; SELLAM *et al.* 2012) (**Table S2**). *dot6* mutant was unable to activate properly genes with  
273 functions mainly associated with protein translation, including ribosome biogenesis and  
274 structural constituents of the ribosome (**Figure 3A**). This suggest that in contrast to the role of its  
275 orthologue in *S. cerevisiae*, Dot6 in *C. albicans* is an activator of *RiBi*. Analysis of promoter  
276 region of transcript downregulated in *dot6* (transcript with 1.5-fold reduction using 5% FDR-  
277 **Table S3**) showed the occurrence of the PAC motif bound by Dot6 in all promoters of genes  
278 related to *RiBi* (**Figure 3B**). Furthermore, transcripts downregulated in *dot6* exhibited correlation  
279 with the set of genes repressed by the TOR complex inhibitor, rapamycin. This suggest that the  
280 evolutionary conserved *RiBi* transcription control by TOR is mediated fully or partially through  
281 Dot6. In support of the role of Dot6 in transcriptional control of *Ribi* genes and thus translation,  
282 *dot6* mutant exhibited an increased sensitivity to the protein translation inhibitor cycloheximide  
283 as compared to the WT and the revertant strains (**Figure 3C**).

284 The transcriptional programs characterizing the cell cycle G1/S transition in *C. albicans* (COTE *et al.*  
285 2009) were hyperactivated in *dot6* mutant, which is a further support of the role of Dot6 as a  
286 negative regulator of G1/S transcription and Start (**Figure 3A**). Interestingly, *dot6* upregulated  
287 transcripts showed a significant correlation with those activated in the deletion mutant of the  
288 negative regulator of Start in *C. albicans*, Nrm1 (OFIR *et al.* 2012; SELLAM *et al.* 2016).

289

290

### 291 **Dot6 localization is regulated by the TOR signalling pathway**

292 TOR is a central signaling circuit that controls cellular growth in response to environmental  
293 nutrient status and stress in eukaryotes. In *S. cerevisiae*, the transcription factor Sfp1 and the  
294 AGC kinase Sch9 are critical effectors of the TOR pathway and form part of a dynamic, nutrient-  
295 responsive network that controls the expression of *Ribi* genes, ribosomal protein genes and cell  
296 size (JORGENSEN *et al.* 2004; URBAN *et al.* 2007; LEMPIAINEN *et al.* 2009). In *S. cerevisiae*, both

297 *sch9* and *sfp1* mutants are impervious to carbon source effects on Start (JORGENSEN *et al.* 2004).  
298 In *C. albicans*, while *sfp1* and *sch9* mutants have the expected small size phenotype (SELLAM *et*  
299 *al.* 2016), they still retain the ability to respond to carbon source shifts, unlike the *S. cerevisiae*  
300 counterparts (**Figure S1**). This suggest that the Sfp1-Sch9 regulatory circuit had rewired and is  
301 unlikely to rely on the nutrient status of the cell to Start control in *C. albicans*.

302 To assess whether the nutrient-sensitive TOR pathway communicates the nutrient status to Dot6,  
303 we first tested whether altering TOR activity by rapamycin could alter the subcellular  
304 localization of the Dot6-GFP fusion. In the absence of rapamycin, Dot6-GFP was localized  
305 exclusively in the nucleus in agreement with its role as a transcriptional activator under nutrient  
306 rich environment (**Figure 4A-C**). A weak GFP signal was also observed in the nucleolus and the  
307 vacuole. When cells were treated with rapamycin, Dot6-GFP was rapidly relocated to the  
308 vacuole and only a small fraction remain in the nucleus (**Figure 4D-F**). The vacuolar localization  
309 of the Dot6-GFP was confirmed by its co localization with the CellTracker Blue-stained  
310 vacuoles (**Figure S2**). These data suggest that TOR pathway regulates the transcriptional  
311 function of Dot6.

312  
313 To assess whether the control of Dot6 activity by TOR impacts the cell size of *C. albicans*, we  
314 examined genetic interactions between *TOR1* and *DOT6* by size epistasis. As *TOR1* is an  
315 essential gene in *C. albicans*, we first tried to delete one allele in *dot6* homozygous mutant.  
316 However, all attempts to generate such mutant were unsuccessful suggesting a haplo-essentiality  
317 of *TOR1* in *dot6* mutant background. Subsequently, we analysed genetic interaction of *TOR1* and  
318 *DOT6* using complex haploinsufficiency (CHI) concept by deleting one allele of each gene and  
319 measured size distribution of the obtained mutant. While both *DOT6/dot6* and *TOR1/Tor1*  
320 mutants had no disenable size defect, the *TOR1/tor1 DOT6/dot6* strain exhibited cell size  
321 distribution similar to that of *dot6/dot6*, suggesting that *DOT6* is epistatic to *TOR1* (**Figure 4G**).  
322 Similarly, *DOT6* was also epistatic to *TOR1* with respect to their sensitivity toward rapamycin  
323 (**Figure 4H**). These data demonstrate that TOR pathway control cell size through Dot6.

324  
325 **Dot6 is required for carbon-source modulation of cell size**  
326 The effect of different carbon sources was assessed on the size distribution of the *dot6* mutant  
327 and the WT. While the cell size of WT and the revertant strains was reduced by 12 % ( $47.6 \pm 0.5$   
328 fL) when grown under the poor carbon source, glycerol, as compared to glucose ( $54.2 \pm 0.5$  fL),  
329 *dot6* size remain unchanged regardless the carbon source (**Figure 5A-B**). Similar finding was  
330 obtained when comparing cells growing on the non-fermentable carbon source, ethanol (data not  
331 shown). These results demonstrate that the transcription factor Dot6 is required for nutrient  
332 modulation of cell size. Furthermore, strain lacking *DOT6* was rate-limiting when grown in  
333 medium with glycerol as a sole source of carbon as compared to glucose (**Figure 5C**).

334  
335 To check whether Dot6 localization is modulated by carbon sources, the subcellular localization  
336 of the Dot6-GFP fusion was tested in cells that grew in poor (glycerol) or in the absence of  
337 carbon sources. Neither the absence or the quality of carbon sources altered the nuclear  
338 localization of Dot6 (data not shown). This suggest that Dot6 govern the carbon-source  
339 modulation of cell size through a mechanism that is independent from its cellular relocation

340  
341 **The CTG-clade specific acidic domain of Dot6 is not required for size control**



342 Our analysis unexpectedly reveals that Dot6 switched between activator and repressor  
343 transcriptional regulator of *Ribi* between *C. albicans* and *S. cerevisiae*, respectively. Sequence  
344 examination of *C. albicans* Dot6 protein revealed a C-terminal aspartate-rich domain that is  
345 similar to acidic activation domains of transcriptional activators. This Dot6 D-rich domain was  
346 found specifically in *C. albicans* and other related species of the CTG clade, and it was absent in  
347 Dot6 orthologs in *S. cerevisiae* and other ascomycetes (**Figure 6A**). To check whether the  
348 presence of this acidic domain corroborates with its function as transcriptional activator in *C.*  
349 *albicans*, we deleted this D-rich domain using CRISPR-Cas9 mutagenesis tool. Size distribution  
350 of the truncated *DOT6*- $\Delta$ [1555-1803] strain was indistinguishable from that of the WT parental  
351 strain (**Figure 6B**). The ability of *DOT6*- $\Delta$ [1555-1803] to activate two *Ribi* transcripts (*DBP7*  
352 and *KRE33*) was preserved which suggest that this domain is dispensable for the size control and  
353 gene expression activation functions of Dot6 (**Figure 6C**).

354

## 355 Discussion

356

357 Although both *C. albicans* and *S. cerevisiae* share the core cell cycle and growth regulatory  
358 machineries, our previous investigations uncovered a limited overlap of the cell size phenome  
359 between the two fungi (SELLAM *et al.* 2016; CHAILLOT *et al.* 2017). This finding is corroborated  
360 by recent evidences showing an extensive degree of rewiring and plasticity of both  
361 transcriptional regulatory circuits and signalling pathways across many cellular and metabolic  
362 processes between the two yeasts (HOMANN *et al.* 2009; LAVOIE *et al.* 2009; BLANKENSHIP *et al.*  
363 2010; LAVOIE *et al.* 2010; LI AND JOHNSON 2010; CHILDERS *et al.* 2016). The plasticity of the  
364 global size network underscores the evolutionary impact of cell size as an adaptive mechanism to  
365 optimize fitness. Indeed, many size gene in *C. albicans* were linked to virulence which suggest  
366 that cell size is an important biological trait that contribute to the adaptation of fungal pathogens  
367 to their different niches (SELLAM *et al.* 2016; CHAILLOT *et al.* 2017). So far, the requirement of  
368 Dot6 for the fitness of *C. albicans* inside its host was not tested yet, however, inactivation of  
369 *DOT6* led to the alteration of different virulence traits such as the sensitivity toward antifungals  
370 (VANDEPUTTE *et al.* 2012). Moreover, while *dot6* mutant was able to form invasive filaments, the  
371 size of hyphae cells was significantly reduced which might impact the invasiveness of host  
372 tissues and organs (**Figure S3**). This reinforce the fact that control of cell size homeostasis is an  
373 important attribute for this *C. albicans* to persist inside its host.

374

375 We found that Dot6 is a major regulator of cell size in *C. albicans* as compared to *S. cerevisiae*  
376 emphasizing an evolutionary drift regarding the contribution of this transcription factor in size  
377 modulation. The potency of the *C. albicans* Dot6 in size control could be attributed to different  
378 facts. First, and in contrast to its role in *S. cerevisiae*, Dot6 is an activator of *Ribi* genes. This  
379 might explain the small size of *dot6* in *C. albicans* given the fact that inactivation of  
380 transcriptional activators of *Ribi* genes such as Sfp1 and Sch9 in either *S. cerevisiae* or *C.*  
381 *albicans* led to the acceleration of Start and, consequently, to a *whi* phenotype (JORGENSEN *et al.*  
382 2002; DUNGRAWALA *et al.* 2012; SOIFER AND BARKAI 2014; SELLAM *et al.* 2016; CHAILLOT *et*  
383 *al.* 2017). Second, in *C. albicans*, Dot6 had an expanded genetic connectivity with both the  
384 critical SBF complex, that control the the G1/S transition, and also with the TOR growth and  
385 *Ribi* machineries, which might explain the influential role of Dot6 in size control.

386

387 Our findings support a model where Dot6 acts as a hub that might integrate directly growth cues  
388 via the TOR pathway to control the commitment to mitotic division at G1. This regulatory  
389 behavior is similar to the p38/HOG1 pathway that controls the *Ribi* regulon through the master  
390 transcriptional regulator, Sfp1, and acts upstream the SBF transcription factor complex to control  
391 division (SELLAM *et al.* 2016). Meanwhile, our genetic interaction analysis showed that the *dot6*  
392 *hog1* double mutant had an additive small size phenotype suggesting that both Dot6 and Hog1  
393 act in parallel. This finding emphasizes that, in *C. albicans*, multiple signals are integrated at the  
394 level of G1 machinery to optimize adaptation to different conditions. Contrary to the p38/HOG  
395 pathway, Dot6 were required for both growth and size adjustment in response to glycerol  
396 suggesting that this transcription factor provides a nexus for integrating carbon nutrient status to  
397 the ribosome synthesis and Start machineries (**Figure 7**).

398  
399

## 400 References

- 401  
402 Berman, J., 2006 Morphogenesis and cell cycle progression in *Candida albicans*. *Curr Opin*  
403 *Microbiol* 9: 595-601.
- 404 Blankenship, J. R., S. Fanning, J. J. Hamaker and A. P. Mitchell, 2010 An extensive circuitry for  
405 cell wall regulation in *Candida albicans*. *PLoS Pathog* 6: e1000752.
- 406 Chaillot, J., M. A. Cook, J. Corbeil and A. Sellam, 2017 Genome-Wide Screen for  
407 Haploinsufficient Cell Size Genes in the Opportunistic Yeast *Candida albicans*. *G3*  
408 (Bethesda) 7: 355-360.
- 409 Childers, D. S., I. Raziunaite, G. Mol Avelar, J. Mackie, S. Budge *et al.*, 2016 The Rewiring of  
410 Ubiquitination Targets in a Pathogenic Yeast Promotes Metabolic Flexibility, Host  
411 Colonization and Virulence. *PLoS Pathog* 12: e1005566.
- 412 Costanzo, M., J. L. Nishikawa, X. Tang, J. S. Millman, O. Schub *et al.*, 2004 CDK activity  
413 antagonizes Whi5, an inhibitor of G1/S transcription in yeast. *Cell* 117: 899-913.
- 414 Cote, P., H. Hogues and M. Whiteway, 2009 Transcriptional analysis of the *Candida albicans*  
415 cell cycle. *Mol Biol Cell* 20: 3363-3373.
- 416 de Bruin, R. A., W. H. McDonald, T. I. Kalashnikova, J. Yates, 3rd and C. Wittenberg, 2004  
417 Cln3 activates G1-specific transcription via phosphorylation of the SBF bound repressor  
418 Whi5. *Cell* 117: 887-898.
- 419 Dungrawala, H., H. Hua, J. Wright, L. Abraham, T. Kasemsri *et al.*, 2012 Identification of new  
420 cell size control genes in *S. cerevisiae*. *Cell Div* 7: 24.
- 421 Gola, S., R. Martin, A. Walther, A. Dunkler and J. Wendland, 2003 New modules for PCR-based  
422 gene targeting in *Candida albicans*: rapid and efficient gene targeting using 100 bp of  
423 flanking homology region. *Yeast* 20: 1339-1347.
- 424 Guillemette, T., A. Sellam and P. Simoneau, 2004 Analysis of a nonribosomal peptide synthetase  
425 gene from *Alternaria brassicae* and flanking genomic sequences. *Curr Genet* 45: 214-224.
- 426 Homann, O. R., J. Dea, S. M. Noble and A. D. Johnson, 2009 A phenotypic profile of the  
427 *Candida albicans* regulatory network. *PLoS Genet* 5: e1000783.
- 428 Huber, A., S. L. French, H. Tekotte, S. Yerlikaya, M. Stahl *et al.*, 2011 Sch9 regulates ribosome  
429 biogenesis via Stb3, Dot6 and Tod6 and the histone deacetylase complex RPD3L. *EMBO*  
430 *J* 30: 3052-3064.
- 431 Jorgensen, P., J. L. Nishikawa, B. J. Breikreutz and M. Tyers, 2002 Systematic identification of  
432 pathways that couple cell growth and division in yeast. *Science* 297: 395-400.

- 433 Jorgensen, P., I. Rupes, J. R. Sharom, L. Schneper, J. R. Broach *et al.*, 2004 A dynamic  
434 transcriptional network communicates growth potential to ribosome synthesis and critical  
435 cell size. *Genes Dev* 18: 2491-2505.
- 436 Kafri, M., E. Metzler-Raz, G. Jona and N. Barkai, 2016 The Cost of Protein Production. *Cell Rep*  
437 14: 22-31.
- 438 Lavoie, H., H. Hogues, J. Mallick, A. Sellam, A. Nantel *et al.*, 2010 Evolutionary tinkering with  
439 conserved components of a transcriptional regulatory network. *PLoS Biol* 8: e1000329.
- 440 Lavoie, H., H. Hogues and M. Whiteway, 2009 Rearrangements of the transcriptional regulatory  
441 networks of metabolic pathways in fungi. *Curr Opin Microbiol* 12: 655-663.
- 442 Lempiainen, H., A. Uotila, J. Urban, I. Dohnal, G. Ammerer *et al.*, 2009 Sfp1 interaction with  
443 TORC1 and Mrs6 reveals feedback regulation on TOR signaling. *Mol Cell* 33: 704-716.
- 444 Lenski, R. E., and M. Travisano, 1994 Dynamics of adaptation and diversification: a 10,000-  
445 generation experiment with bacterial populations. *Proc Natl Acad Sci U S A* 91: 6808-  
446 6814.
- 447 Li, H., and A. D. Johnson, 2010 Evolution of transcription networks--lessons from yeasts. *Curr*  
448 *Biol* 20: R746-753.
- 449 Lippman, S. I., and J. R. Broach, 2009 Protein kinase A and TORC1 activate genes for ribosomal  
450 biogenesis by inactivating repressors encoded by Dot6 and its homolog Tod6. *Proc Natl*  
451 *Acad Sci U S A* 106: 19928-19933.
- 452 Marion, R. M., A. Regev, E. Segal, Y. Barash, D. Koller *et al.*, 2004 Sfp1 is a stress- and  
453 nutrient-sensitive regulator of ribosomal protein gene expression. *Proc Natl Acad Sci U S*  
454 *A* 101: 14315-14322.
- 455 Merico, D., R. Isserlin, O. Stueker, A. Emili and G. D. Bader, 2010 Enrichment map: a network-  
456 based method for gene-set enrichment visualization and interpretation. *PLoS One* 5:  
457 e13984.
- 458 Ofir, A., K. Hofmann, E. Weindling, T. Gildor, K. S. Barker *et al.*, 2012 Role of a *Candida*  
459 *albicans* Nrm1/Whi5 homologue in cell cycle gene expression and DNA replication stress  
460 response. *Mol Microbiol* 84: 778-794.
- 461 Saito, R., M. E. Smoot, K. Ono, J. Ruschinski, P. L. Wang *et al.*, 2012 A travel guide to  
462 Cytoscape plugins. *Nat Methods* 9: 1069-1076.
- 463 Sandai, D., Z. Yin, L. Selway, D. Stead, J. Walker *et al.*, 2012 The evolutionary rewiring of  
464 ubiquitination targets has reprogrammed the regulation of carbon assimilation in the  
465 pathogenic yeast *Candida albicans*. *MBio* 3.
- 466 Schmoller, K. M., and J. M. Skotheim, 2015 The Biosynthetic Basis of Cell Size Control. *Trends*  
467 *Cell Biol* 25: 793-802.
- 468 Sellam, A., J. Chaillot, J. Mallick, F. Tebbji, J. Richard Albert *et al.*, 2016 A systematic cell size  
469 screen uncovers coupling of growth to division by the p38/HOG network in  
470 *Candida albicans*. *bioRxiv*.
- 471 Sellam, A., F. Tebbji and A. Nantel, 2009 Role of Ndt80p in sterol metabolism regulation and  
472 azole resistance in *Candida albicans*. *Eukaryot Cell* 8: 1174-1183.
- 473 Sellam, A., F. Tebbji, M. Whiteway and A. Nantel, 2012 A novel role for the transcription factor  
474 Cwt1p as a negative regulator of nitrosative stress in *Candida albicans*. *PLoS One* 7:  
475 e43956.
- 476 Sellam, A., M. van het Hoog, F. Tebbji, C. Beaurepaire, M. Whiteway *et al.*, 2014 Modeling the  
477 transcriptional regulatory network that controls the early hypoxic response in *Candida*  
478 *albicans*. *Eukaryot Cell* 13: 675-690.

479 Soifer, I., and N. Barkai, 2014 Systematic identification of cell size regulators in budding yeast.  
480 Mol Syst Biol 10: 761.

481 Subramanian, A., P. Tamayo, V. K. Mootha, S. Mukherjee, B. L. Ebert *et al.*, 2005 Gene set  
482 enrichment analysis: a knowledge-based approach for interpreting genome-wide  
483 expression profiles. Proc Natl Acad Sci U S A 102: 15545-15550.

484 Turner, J. J., J. C. Ewald and J. M. Skotheim, 2012 Cell size control in yeast. Curr Biol 22:  
485 R350-359.

486 Tyers, M., G. Tokiwa and B. Futcher, 1993 Comparison of the *Saccharomyces cerevisiae* G1  
487 cyclins: Cln3 may be an upstream activator of Cln1, Cln2 and other cyclins. EMBO J 12:  
488 1955-1968.

489 Urban, J., A. Soulard, A. Huber, S. Lippman, D. Mukhopadhyay *et al.*, 2007 Sch9 is a major  
490 target of TORC1 in *Saccharomyces cerevisiae*. Mol Cell 26: 663-674.

491 Vandeputte, P., S. Pradervand, F. Ischer, A. T. Coste, S. Ferrari *et al.*, 2012 Identification and  
492 functional characterization of Rca1, a transcription factor involved in both antifungal  
493 susceptibility and host response in *Candida albicans*. Eukaryot Cell 11: 916-931.

494 Vyas, V. K., M. I. Barrasa and G. R. Fink, 2015 A *Candida albicans* CRISPR system permits  
495 genetic engineering of essential genes and gene families. Sci Adv 1: e1500248.

496 Zhu, C., K. J. Byers, R. P. McCord, Z. Shi, M. F. Berger *et al.*, 2009 High-resolution DNA-  
497 binding specificity analysis of yeast transcription factors. Genome Res 19: 556-566.

498

499

500

501

502

503

504

505

506

507

508

509

510

511

512

513

514

515

516

517

518

519

520

521

522  
523  
524  
525  
526  
527

## 528 **Figure legend.**

529

### 530 **Figure 1. Dot6 is required for Start onset and cell size homeostasis.**

531 (A) Size distributions of the WT (SFY87), *dot6* mutant and the revertant strains. The median  
532 sizes of each strain are indicated in parentheses. (B) Growth of the WT (SFY87), *dot6* mutant  
533 and the revertant (*dot6* p-*DOT6*) strains in SC medium at 30°C. Doubling-times during the  
534 exponential phase of the growth for each strain are indicated in parentheses. (C-D) Start  
535 characterization of *dot6*. (C) Elutriated G1 phase daughter cells were released into fresh media  
536 and assessed for bud emergence as a function of size and G1/S transcription (D). *RNR1* and  
537 *PCL2* transcript levels were assessed by quantitative real-time PCR and normalized to *ACT1*  
538 levels.

539

### 540 **Figure 2. DOT6 size epistasis.**

541 Evaluation of size epistasis between *dot6* and different potent Start mutations. *DOT6* was  
542 inactivated in *sch9* (A), *sfp1* (B), *hog1* (C) and *swi4* (D) mutants and the resulted double mutant  
543 strains were analyzed for cell size distribution. (E) *SWI4* deletion is epistatic to *DOT6* regarding  
544 the growth rate. Cells were grown in SC medium at 30°C under agitation with OD<sub>600</sub> readings  
545 taken every 10 min for 30h. (F) Summary of *DOT6* genetic interactions with the *C. albicans*  
546 Start machinery.

547

### 548 **Figure 3. Dot6 is a positive regulator of ribosome biogenesis genes.**

549 (A) GSEA analysis of differentially expressed genes in a *dot6* mutant relative to the WT strain  
550 (SFY87). Cells were synchronized in G1 phase by centrifugal elutriation and released in fresh  
551 SC medium for 10 min and analyzed for gene expression profiles by DNA microarrays.  
552 Correlations of *dot6* up-regulated (red circles) and down-regulated (blue circles) transcripts are  
553 shown for biological processes, gene lists in different *C. albicans* mutants and experiments. The  
554 diameter of the circle reflects the number of modulated gene transcripts in each gene set. Known  
555 functional connections between related processes are indicated (green lines). Images were  
556 generated in Cytoscape with the Enrichment Map plug-in. (B) Occurrence of the PAC motif in  
557 the promoters of Dot6-modulated *Ribi* genes. The 400bp sequence upstream the start codon of  
558 downregulated genes in *dot6* (transcript with 1.5-fold reduction using 5% FDR) were scanned for  
559 the CGATG motif. (C) Effect of the translation inhibitor cycloheximide on the growth of the WT  
560 (SFY87), *dot6* mutant and the revertant (*dot6* p-*DOT6*) strains. Strains were grown on in SC  
561 medium at 30°C for 24 hours. Growth was calculated as percentage of OD<sub>600</sub> of treated cells  
562 relatively to the non-treated controls. Results are the mean of three replicates.

563

### 564 **Figure 4. Dot6 localization is regulated by the TOR signalling pathway.**

565 (A-F) Dot6-GFP fluorescence was visualized using confocal microscopy in cells treated (D-F) or  
566 not (A-C) with the TOR pathway inhibitor, rapamycin. Exponentially grown cells in SC medium



567 were treated with 100 ng/ml rapamycin for 1 hour. Nuclear and mitochondrial DNA were  
568 demarcated by DAPI staining (B and E). Red arrows indicate Dot6-GFP florescence in nucleolar  
569 regions. (G-H) *DOT6* and *TOR1* genetic interaction for cell size and growth in the presence of  
570 rapamycin based on complex haploinsufficiency concept. (G) Size distributions of the WT  
571 (SN250), the heterozygous (*DOT6/dot6*) and homozygous (*dot6/dot6*) *dot6* mutants, the  
572 heterozygous *TOR1/tor1* strain and the double heterozygous mutant *TOR1/tor1 DOT6/dot6*. (H)  
573 *DOT6* is epistatic to *TOR1* with respect to their sensitivity toward rapamycin. Strains were  
574 grown on in SC medium at 30°C for 24 hours. Growth was calculated as percentage of OD<sub>600</sub> of  
575 rapamycin-treated cells relatively to the non-treated controls. Results are the mean of three  
576 replicates.

577

### 578 **Figure 5. Dot6 is required for carbon-source modulation of cell size.**

579 (A) Cell size distribution of the WT and *dot6* mutant strains grown in medium with either  
580 glucose or glycerol as the sole source of carbon. (B) Median size of the WT (SFY87), *dot6*  
581 mutant and the revertant strains growing in synthetic glucose or glycerol medium. Results are the  
582 mean of three independent replicates. (C) Growth defect of *dot6* mutant in synthetic glycerol  
583 medium. The WT (SFY87), *dot6* mutant and the revertant strains were grown in synthetic  
584 glucose or glycerol medium at 30°C for 24 hours. Results are the mean of three independent  
585 replicates. The growth rate for each strain is indicated and represent the percentage of OD<sub>600</sub> of  
586 cells grown in glycerol relatively to cells grown in glucose.

587

### 588 **Figure 6. The CTG-clade specific acidic domain of Dot6 is not required for size control.**

589 (A) The C-terminal D-rich domain of Dot6 is conserved in the CTG clade species *C. albicans*  
590 (*Ca*), *C. parapsilosis* (*Cp*) and *C. dubliniensis* (*Cd*) but not in *S. cerevisiae* (*Sc*) and *C. glabrata*  
591 (*Cg*). Identical residues are indicated with asterisks. Conserved and semiconserved substitutions  
592 are denoted by colons and periods, respectively. (B) Cell size distribution of the WT (SC5314)  
593 and the truncated *DOT6-Δ[1555-1803]* strains. (C) Transcript levels of *Ribi* genes, including  
594 *DBP7* and *KRE33*, were evaluated in both WT (SC5314) and the truncated *DOT6-Δ[1555-1803]*  
595 strains. Transcript levels were calculated using the comparative CT method using the *ACT1* gene  
596 as a reference. Results are the mean of three replicates. For each transcript, fold changes in the  
597 WT and the truncated strains were not statistically significant (t-test). NS: not significant.

598

### 599 **Figure 7. Schematic model of connections between Dot6 and Start control machinery in C.** 600 *albicans*.

601

## 602 **Supplementary Material**

603

### 604 **Figure S1. A *sch9* mutant adjusts cell size in response to different carbon sources.**

605 Size distribution of log-phase cultures of the indicated WT (CAI4) and *sch9* strains grown in  
606 synthetic glucose (black curve) and glycerol (red) medium.

607

### 608 **Figure S2. Localization of Dot6-GFP in the vacuole when TOR pathway is compromised.**

609 Dot6-GFP fluorescence was visualized using confocal microscopy in cells treated with the TOR  
610 pathway inhibitor, rapamycin. Vacuoles were stained using CellTracker Blue CMAC dye. Red  
611 and blue arrows indicate Dot6-GFP florescence in the vacuole and the nucleus, respectively.

612

613 **Figure S3. Dot6 is required for size homeostasis of hyphal cells.**

614 Length of at least 20 hyphal cells of both WT (SFY87) and dot6 mutant grown on YPD  
615 supplemented with 10% fetal bovine serum (FBS) at 37°C. Bars represent the means  $\pm$  standard  
616 errors of the means. \*,  $P < 0.0003$  using a two-tailed t-test.

617

618 **Table S1.** Strains used in the current study and their genotypes.

619

620 **Table S2.** Primer sequences used in the current study.

621 **Table S3.** Gene Set Enrichment Analysis (GSEA) of dot6 mutant transcriptome

622

623 **Table S4.** Transcripts differentially expressed in dot6 mutant using a 1.5-fold change cut-off and  
624 a 5% false discovery rate.

625

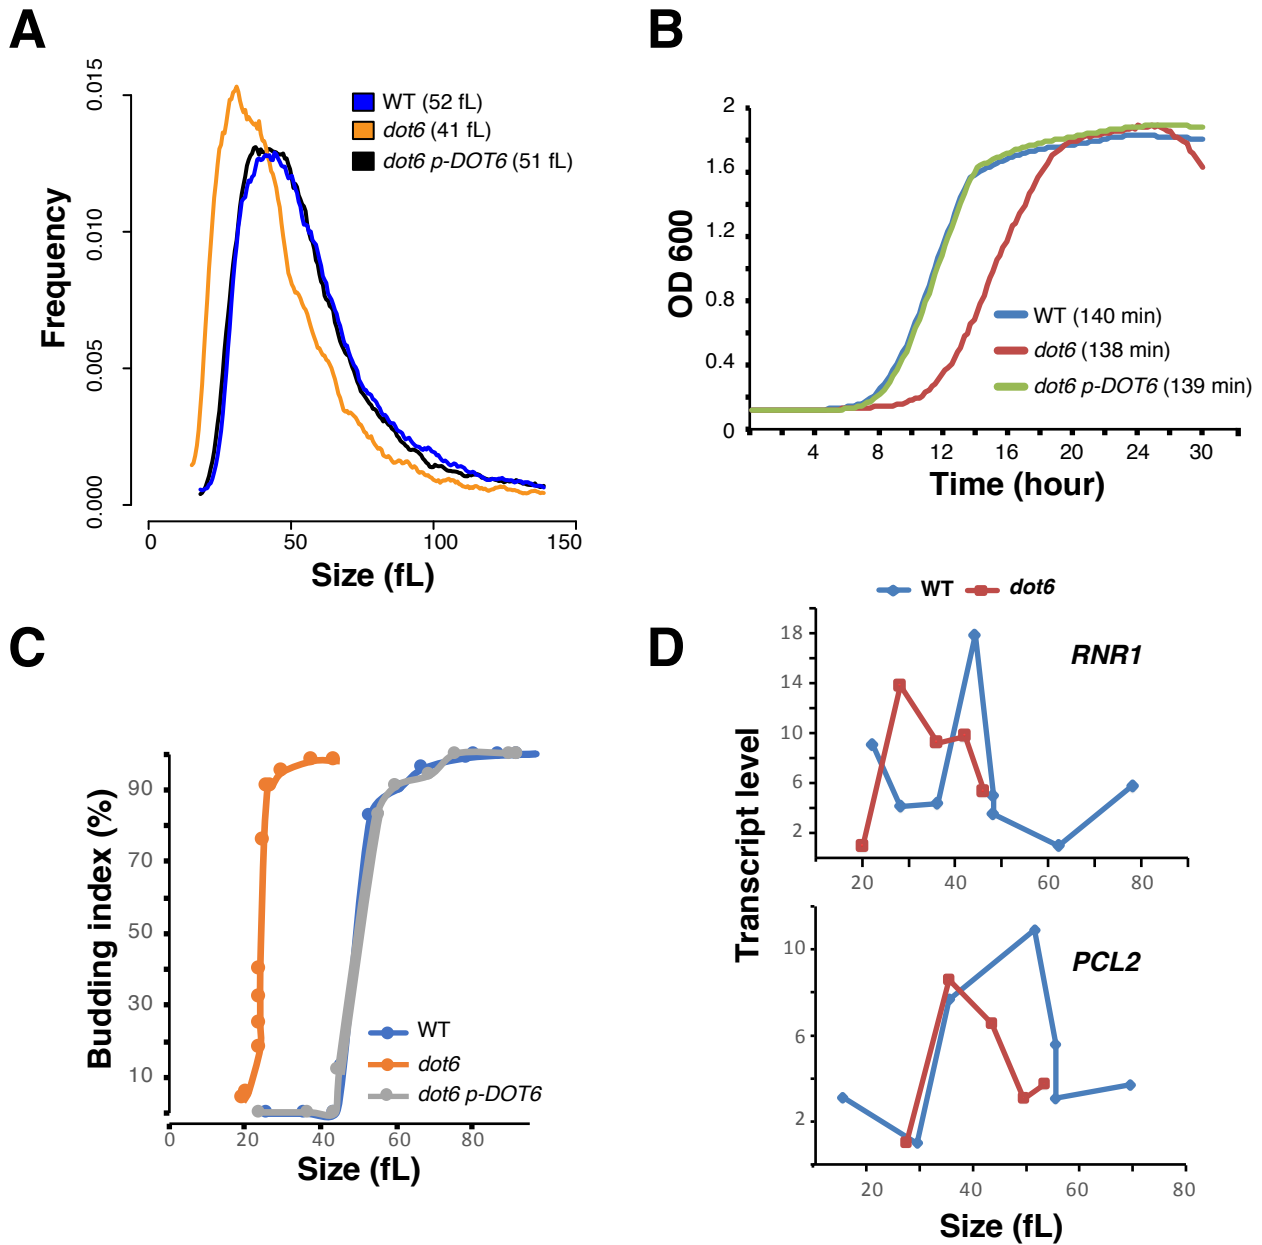

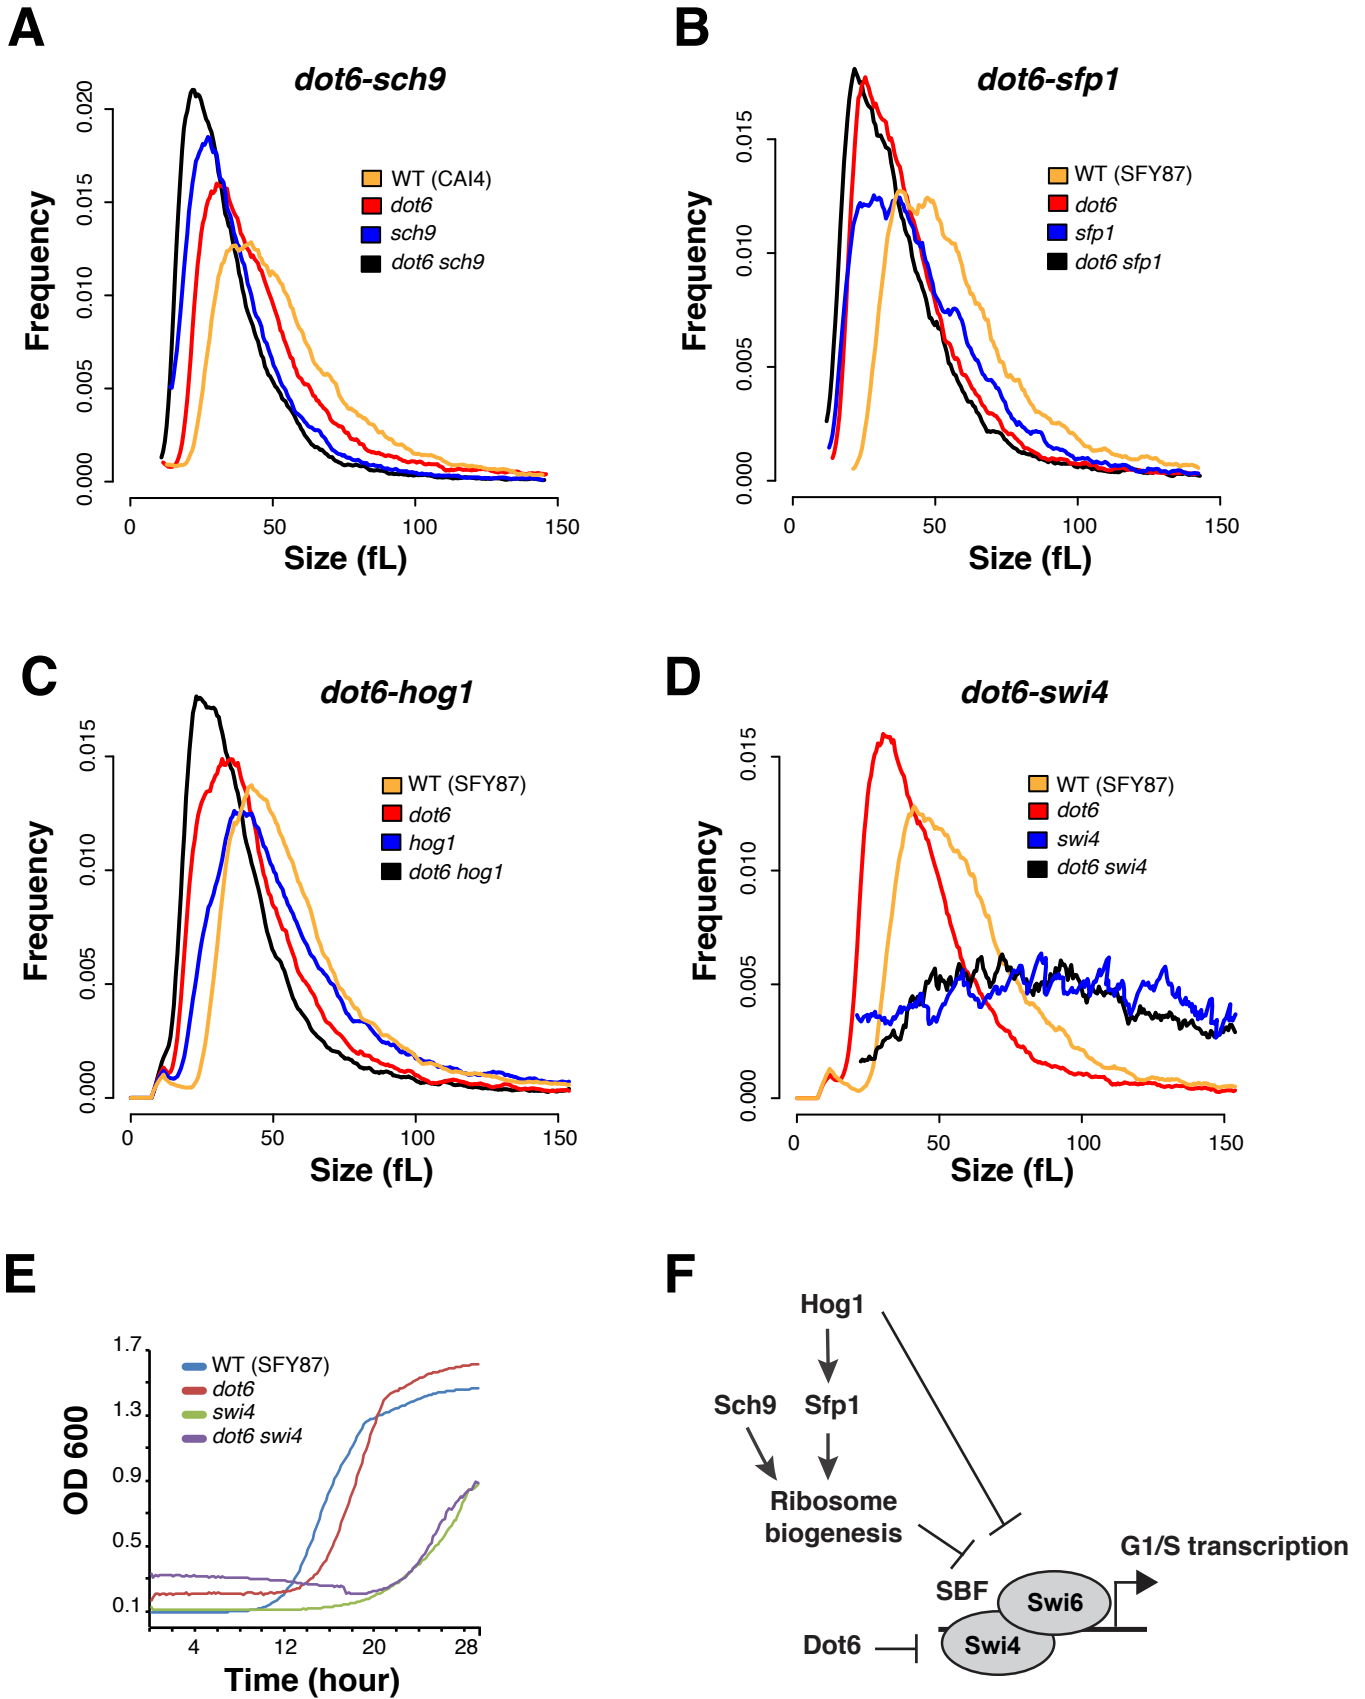

**A**

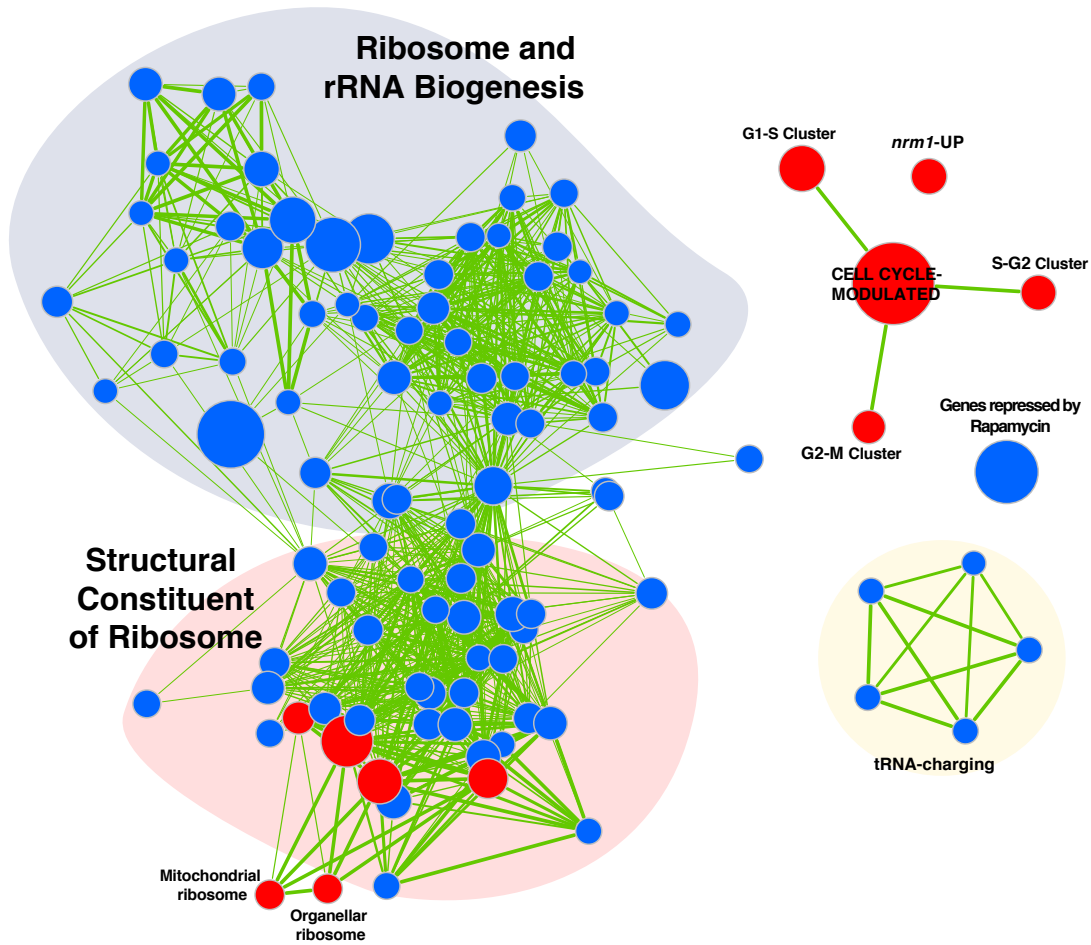

**B**

| Gene         | Orf19 ID   | PAC position/<br>start codon |
|--------------|------------|------------------------------|
| <i>RRP5</i>  | Orf19.1578 | [-142....-137]               |
| <i>PNO1</i>  | Orf19.7618 | [-78....-73]                 |
| <i>VAS1</i>  | Orf19.1295 | [-185....-180]               |
| <i>NOG1</i>  | Orf19.7384 | [-75....-70]                 |
| <i>DBP7</i>  | Orf19.6902 | [-94....-89]                 |
| <i>KRE33</i> | Orf19.512  | [-135....-130]               |
| <i>GCD10</i> | Orf19.500  | [-164....-159]               |
| <i>HAS1</i>  | Orf19.3962 | [-56....-51]                 |
| <i>RSA4</i>  | Orf19.3778 | [-110....-105]               |
| <i>FAF1</i>  | Orf19.1250 | [-38....-33]                 |
| <i>UTP21</i> | Orf19.1566 | [-118....-113]               |
| <i>SQS1</i>  | Orf19.2400 | [-57....-52]                 |
| <i>TAN1</i>  | Orf19.7182 | [-33....-28]                 |
| <i>UBA4</i>  | Orf19.2324 | [-125....-120]               |
| <i>TPT1</i>  | Orf19.5432 | [-5....-1]                   |
| <i>HPM1</i>  | Orf19.4760 | [-5....-1]                   |
| <i>DOT6</i>  | Orf19.2545 | [-364....-359]               |

**C**

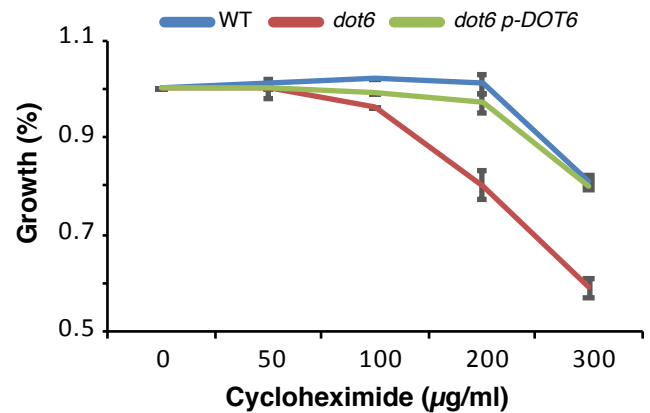



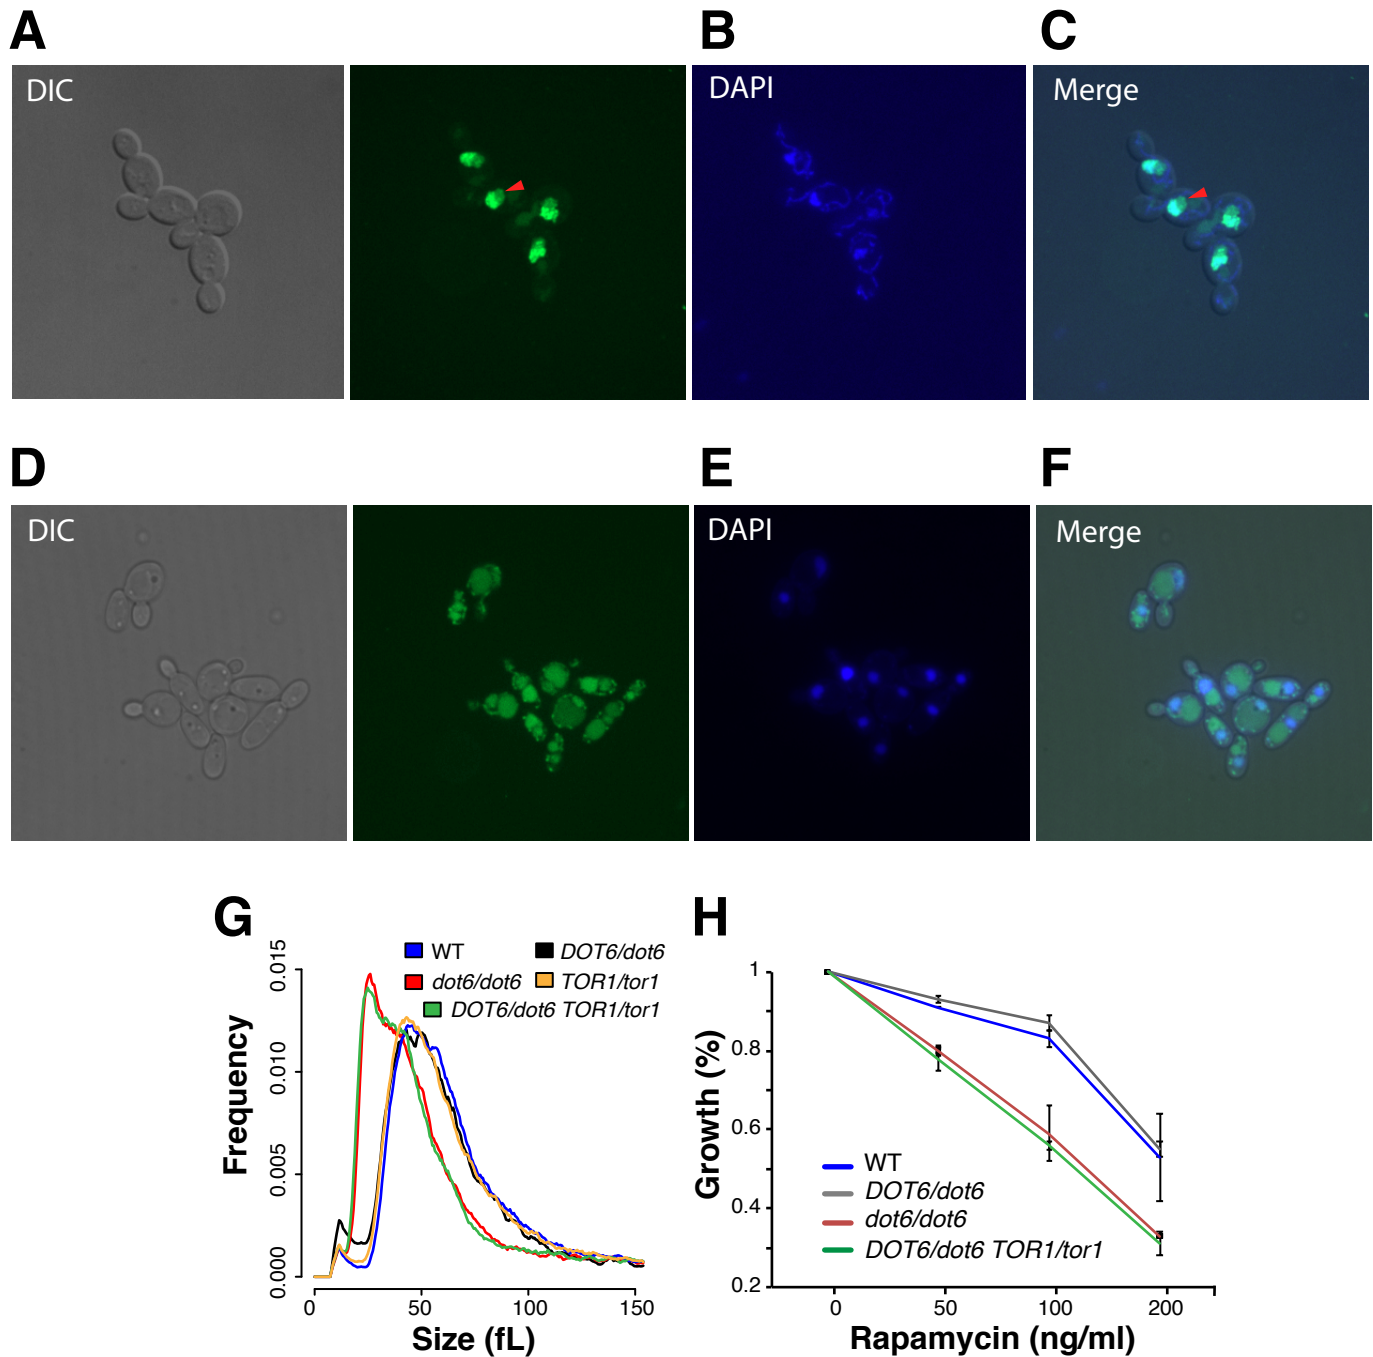

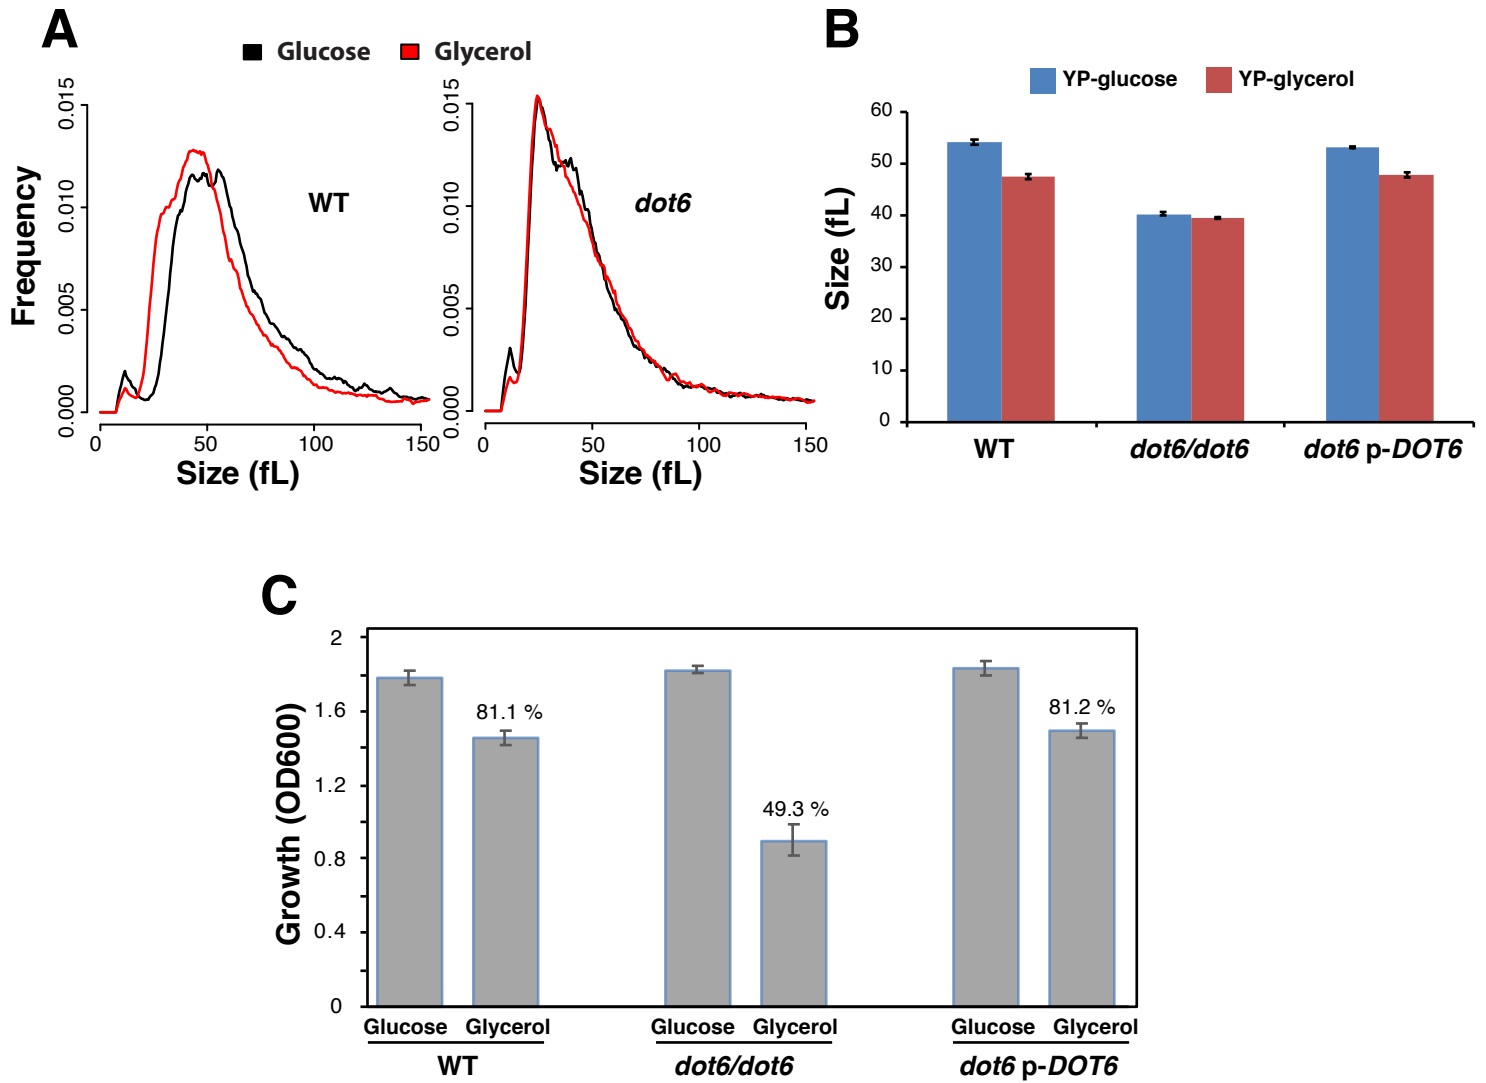

**A**

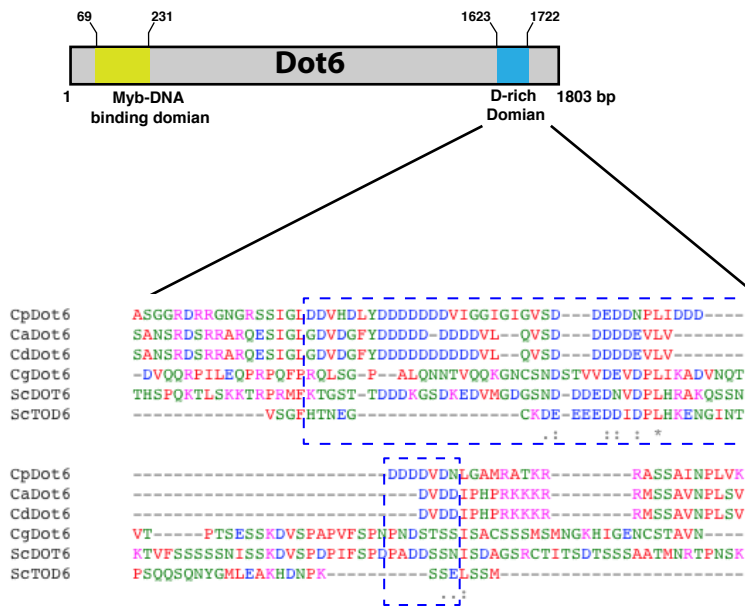

**B**

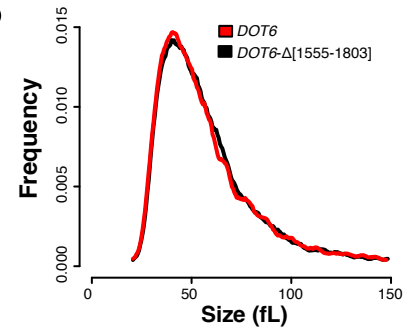

**C**

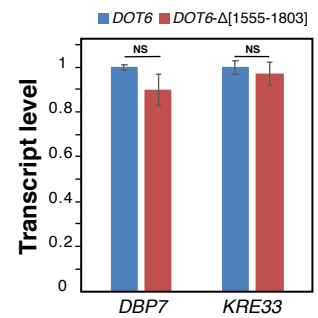

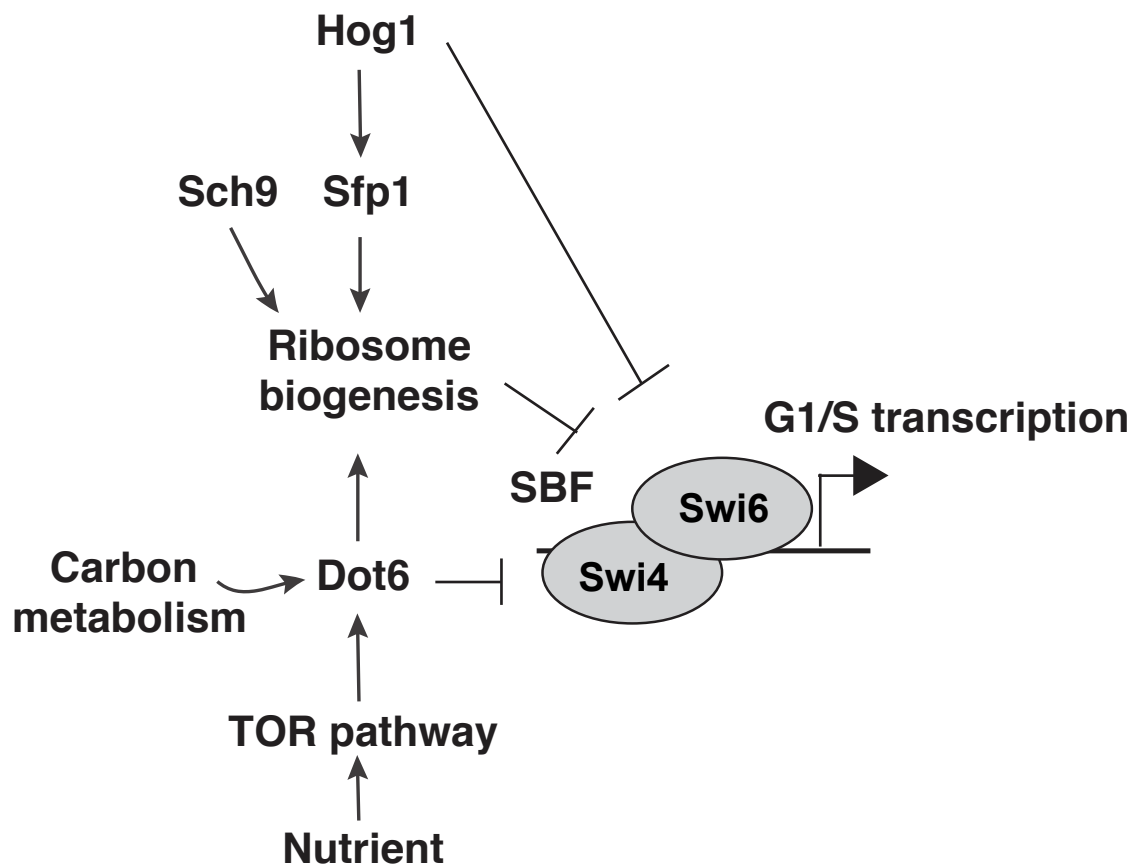

Source: http://biorxiv.org/content/10.1101/401778v1.full.pdf
